# Supplementary material for: Low-temperature direct synthesis of perovskite nanocrystals in water and their application in light-emitting diodes
Source: Royal Society of Chemistry journal article supplement (doi:10.1039/c9nr10679k), 2020-01-01
Supplement: c9nr10679k1.pdf [file c9nr10679k1.pdf]

## Supplementary Information

### Low-temperature Direct Synthesis of Perovskite Nanocrystals in Water and Their Application in Light-Emitting Diodes

Xuefeng Zhang,<sup>a</sup> Long Gao,<sup>a</sup> Min Zhao,<sup>\*a</sup> Yanqin Miao,<sup>\*a</sup> Zhiyuan Wang,<sup>a</sup> Chengqiang Wang,<sup>a</sup> Peizhi Liu,<sup>a</sup> Bingshe Xu<sup>\*a, b</sup> and Junjie Guo<sup>\*a</sup>

<sup>a</sup>Key Laboratory of Interface Science and Engineering in Advanced Materials, Ministry of Education, Taiyuan University of Technology, Taiyuan 030024, China. E-mail: guojunjie@tyut.edu.cn; zhaomin01@tyut.edu.cn; miaoyanqin@tyut.edu.cn; xubs@tyut.edu.cn

<sup>b</sup>Materials Institute of Atomic and Molecular Science, Shaanxi University of Science & Technology, Xi'an 710021, China

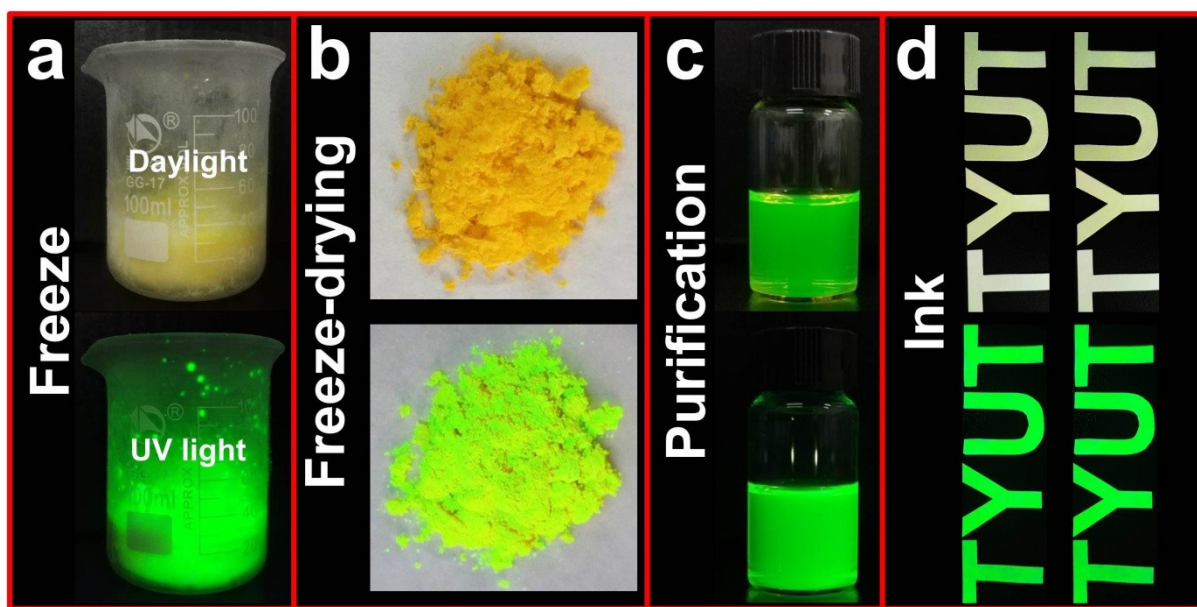

**Fig. S1** a) Frozen state of the aqueous solution contained CsBr, PbBr<sub>2</sub> and surfactant. b) Fluffy CsPbBr<sub>3</sub> powder by freeze-drying. c) CsPbBr<sub>3</sub> NCs solution purified from CsPbBr<sub>3</sub> powder. d) “TYUT” painted by the CsPbBr<sub>3</sub> NCs solution. All the photographs at the first row were taken under daylight, and all the photographs at the second row were taken under UV light.

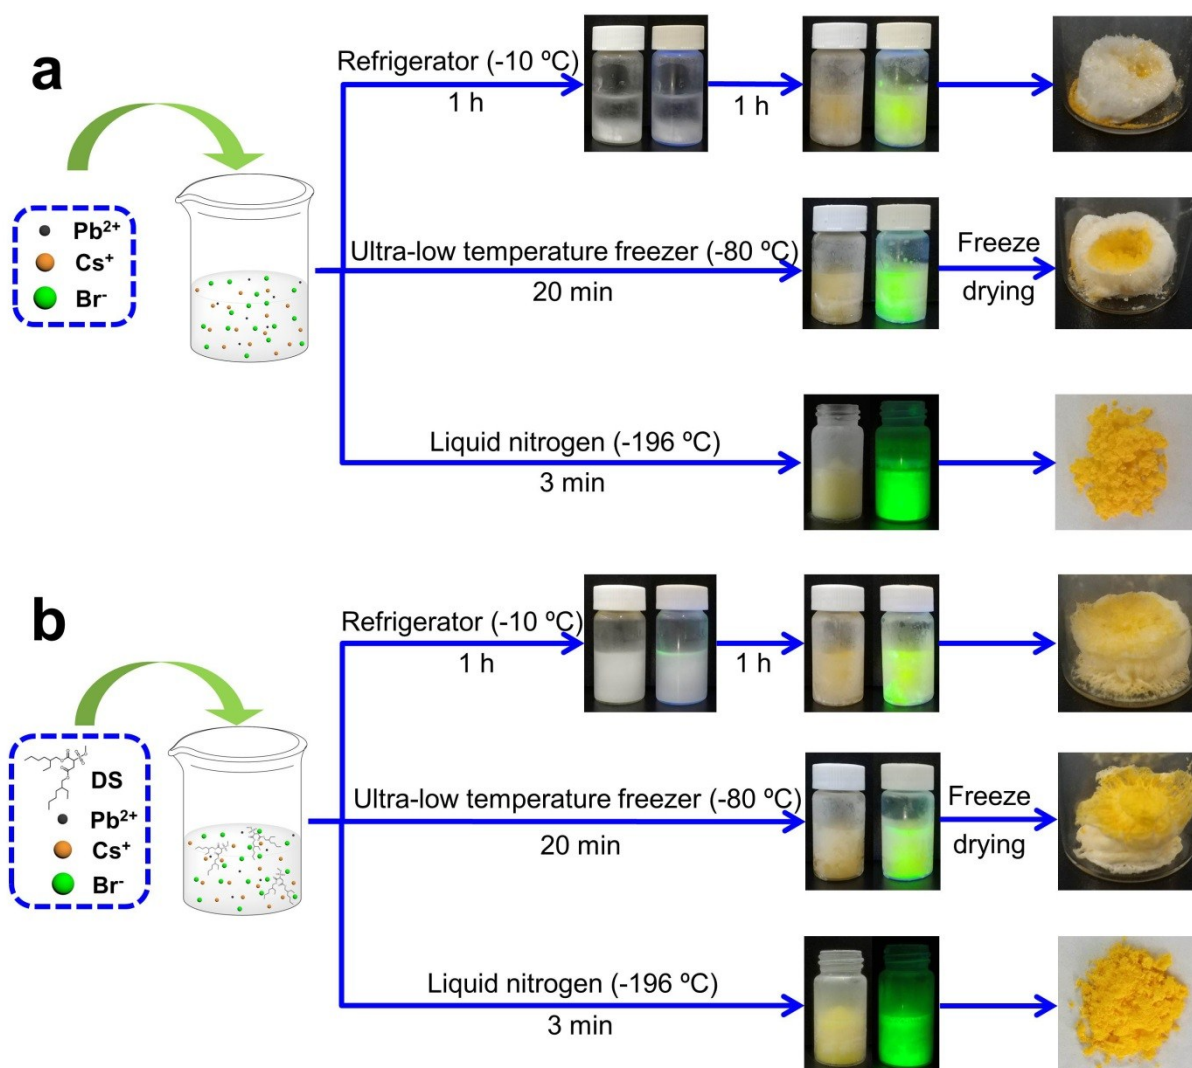

**Fig. S2** a) Schematic illustrations for the freeze-drying process of the precursor solution with no surfactant by three different freezing ways (refrigerator (-10 °C), ultra-low temperature freezer (-80 °C) and liquid nitrogen (-196 °C)). b) Schematic illustrations for the freeze-drying process of the precursor solution with surfactant by three different freezing ways. The left photographs in each group were taken under daylight, and the right photographs were taken under the UV light.

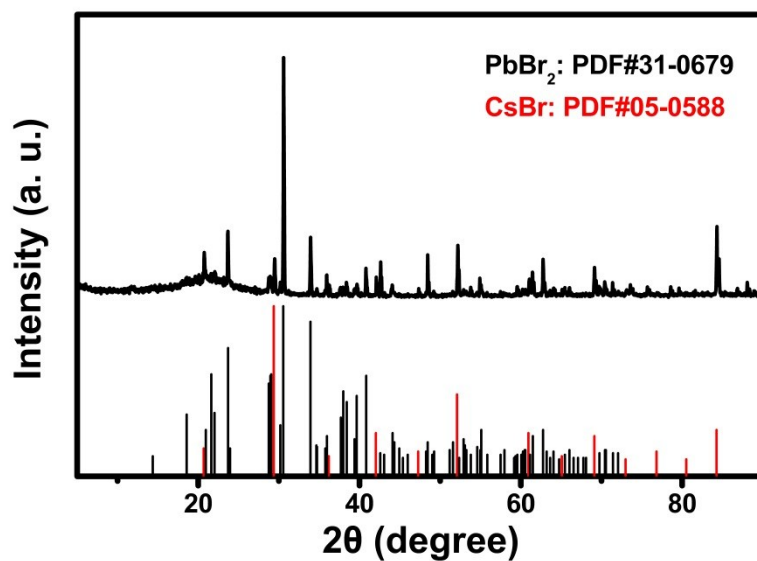

**Fig. S3** XRD pattern of the white solid frozen by the refrigerator for an hour.

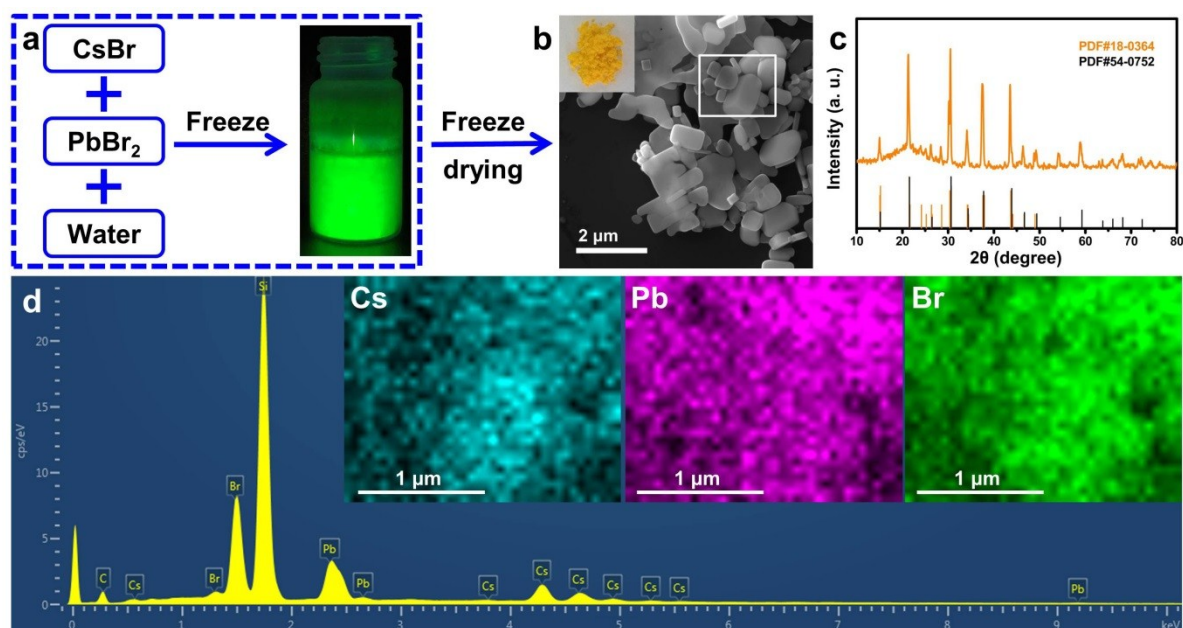

**Fig. S4** a) Illustration of frozen solid under UV light. b) SEM image of surfactant-free  $\text{CsPbBr}_3$  powder. The inset shows the photograph of orange  $\text{CsPbBr}_3$  powder without fluorescence. c) XRD pattern of surfactant-free  $\text{CsPbBr}_3$  powder. d) EDS of Fig. S4b. The inset shows the elemental mapping for the selected part of Fig. S4b.

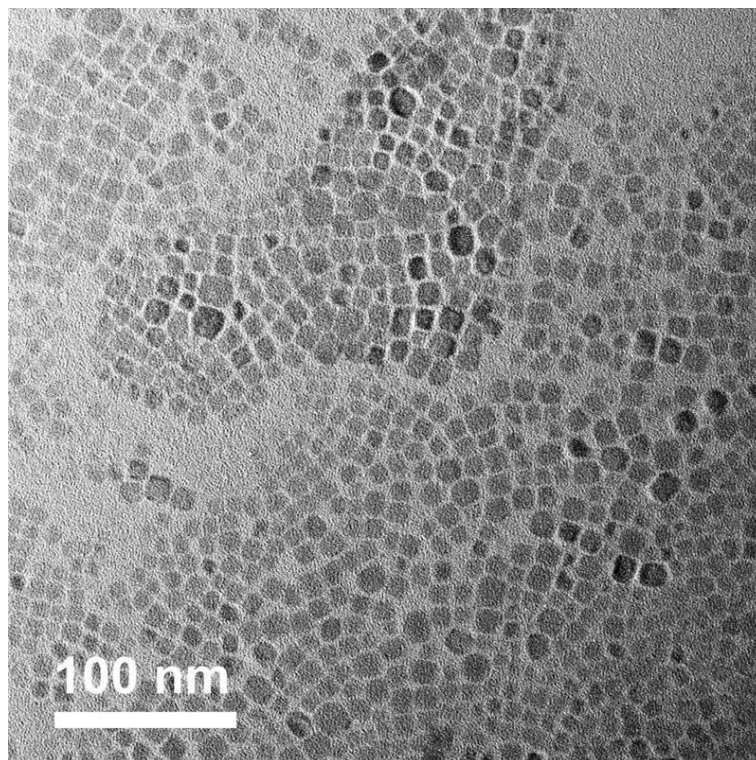

**Fig. S5** Low magnification TEM image of CsPbBr<sub>3</sub> NCs.

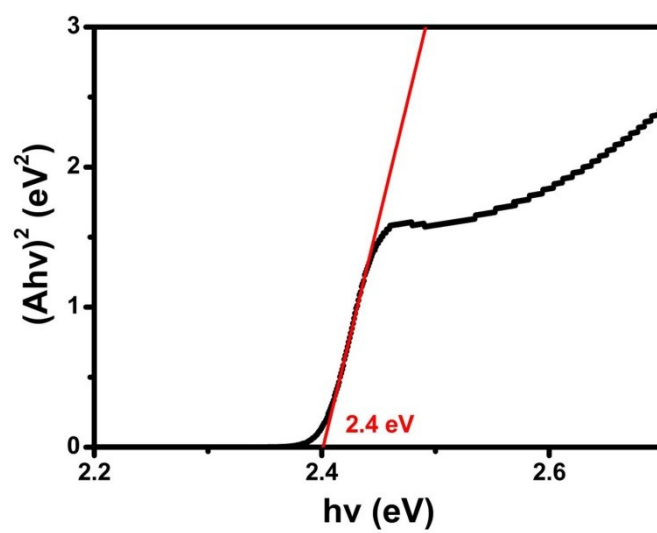

**Fig. S6** Tauc plot of CsPbBr<sub>3</sub> NCs. A is the absorption value Abs, h is the Planck constant and  $\nu$  is the frequency.

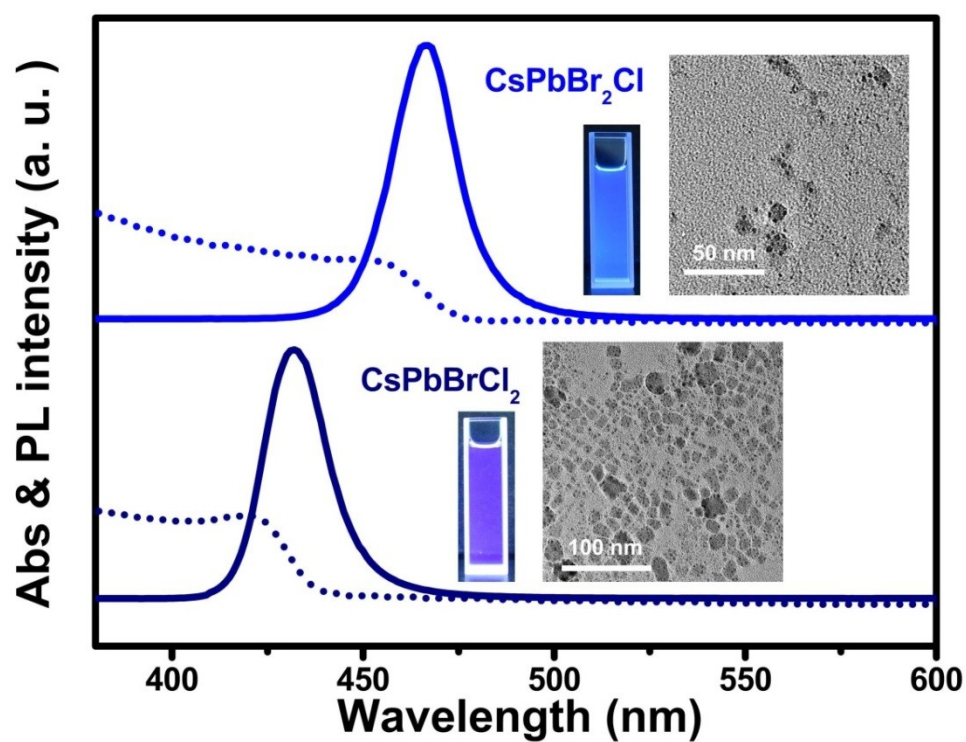

**Fig. S7** Absorption and PL spectra of CsPbBr<sub>2</sub>Cl NCs and CsPbBrCl<sub>2</sub> NCs. Insets show photographs of the prepared NCs in hexane under 365 nm UV light and their TEM images.

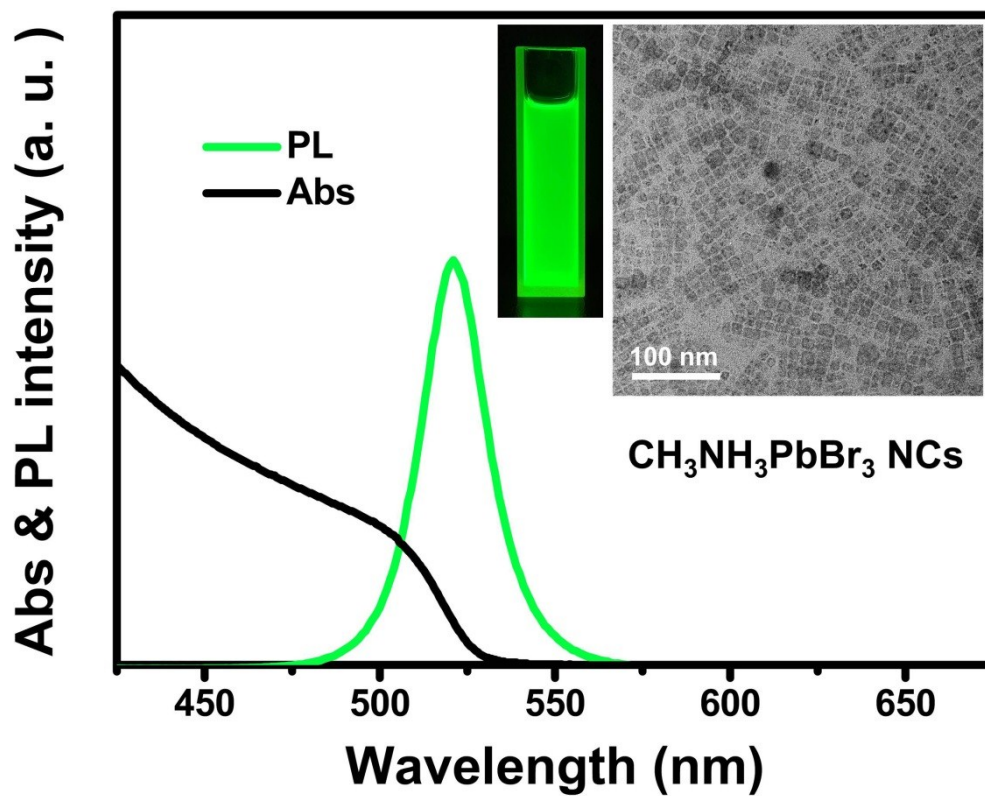

**Fig. S8** Absorption and PL spectra of  $\text{CH}_3\text{NH}_3\text{PbBr}_3$  NCs. Insets show photograph of  $\text{CH}_3\text{NH}_3\text{PbBr}_3$  NCs in hexane under 365 nm UV light and TEM image.

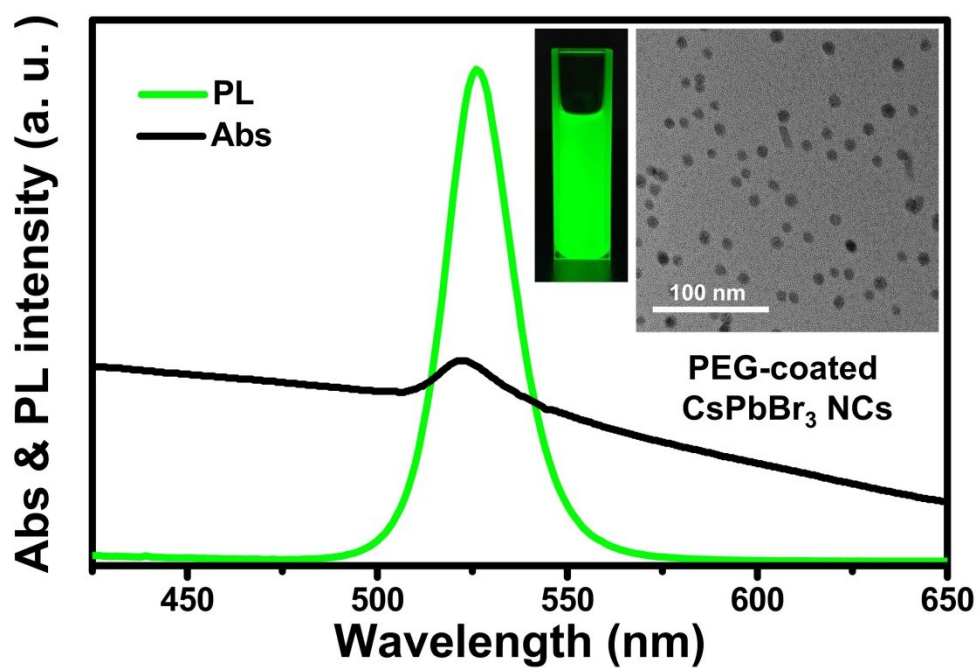

**Fig. S9** Absorption and PL spectra of PEG-coated CsPbBr<sub>3</sub> NCs. The emission peak is 526 nm. Insets show photograph of PEG-coated CsPbBr<sub>3</sub> NCs in hexane under 365 nm UV light and TEM image.

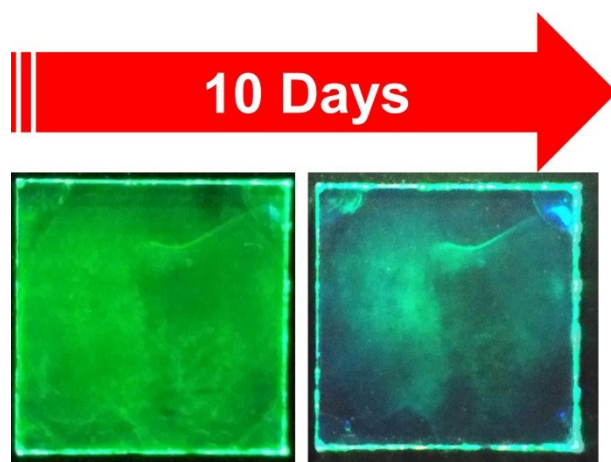

**Fig. S10** Photographs of CsPbBr<sub>3</sub> NCs thin film stored in the ambient (25 °C and humidity of 20 %).

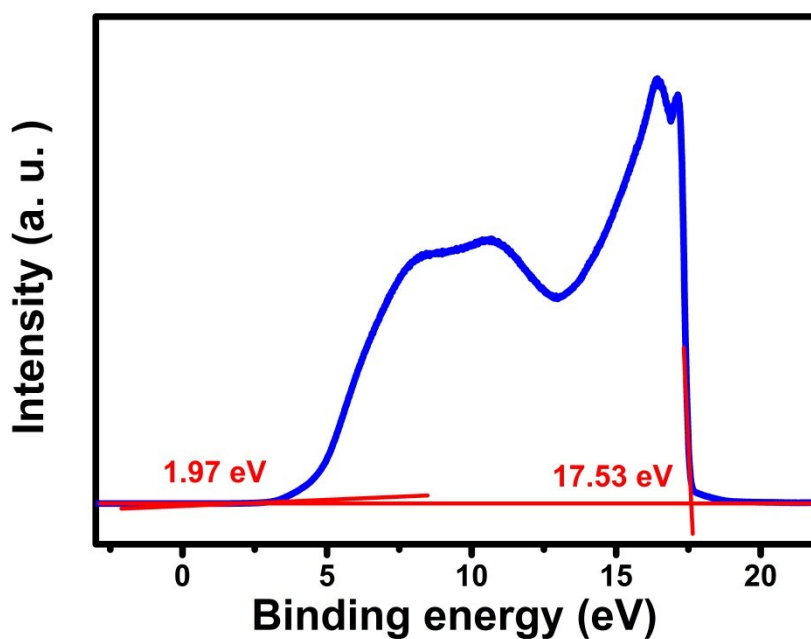

**Fig. S11** UPS spectra of CsPbBr<sub>3</sub> NCs.

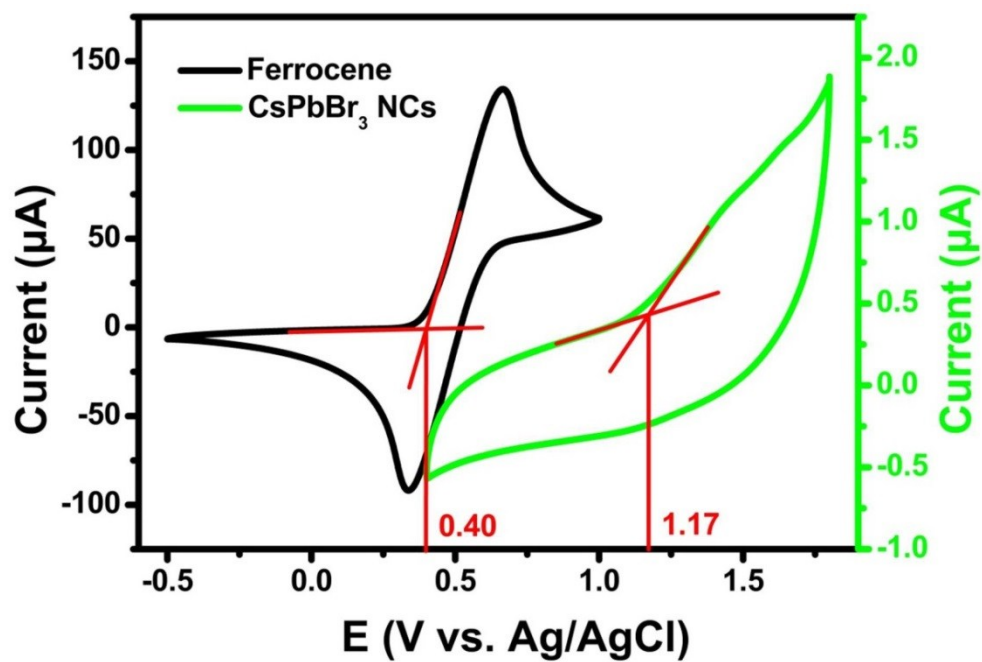

**Fig. S12** Cyclic voltammogram of ferrocene and CsPbBr<sub>3</sub> NCs in dichloromethane with tetrabutylammonium hexafluorophosphate.

$$E_{\text{VB}} = -[E^{\text{OX}} - E(\text{Fc}/\text{Fc}^+) + 4.7] \text{ eV} = -(1.17 - 0.40 + 4.7) \text{ eV} = -5.47 \text{ eV}$$

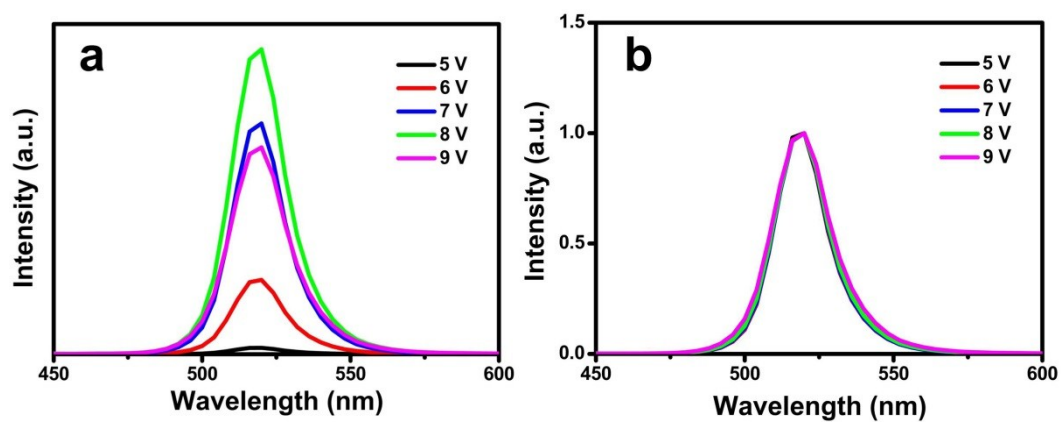

**Fig. S13** a) EL spectrums of CsPbBr<sub>3</sub> NCs LED at different voltage (5-9 V). b) Normalized EL spectrums of CsPbBr<sub>3</sub> NCs LED at different voltage (5-9 V).
